# Supplementary material
Source: Springer Nature journal article supplement (https://www.springermedizin.de/resource/supplementary/12889_2009_2266_MOESM5_ESM.pdf/9485198)
Supplement: MOESM5 [file 9485198]

Relative risk of acquisition of resistance in the private vs. public sector

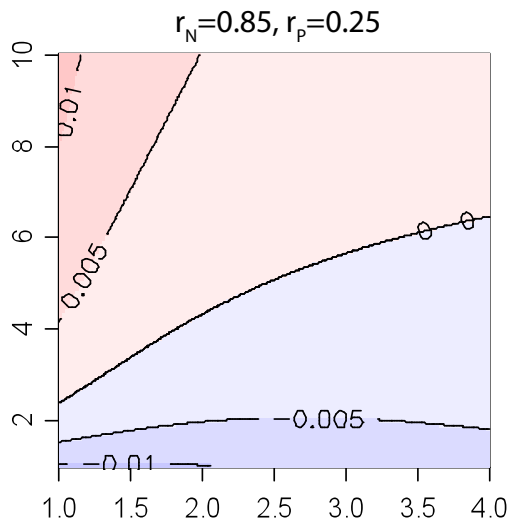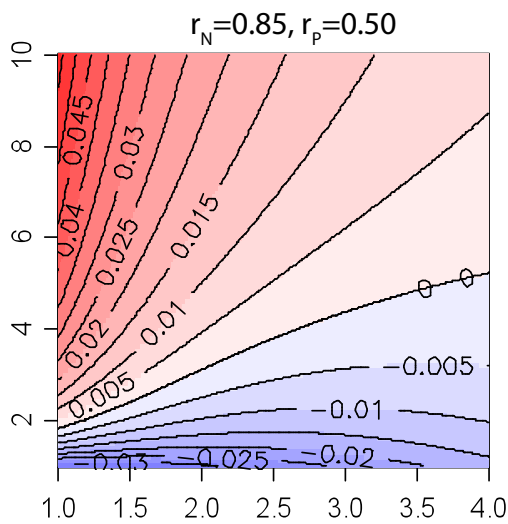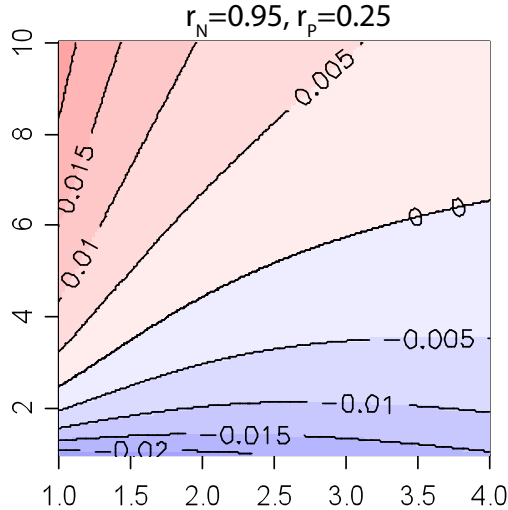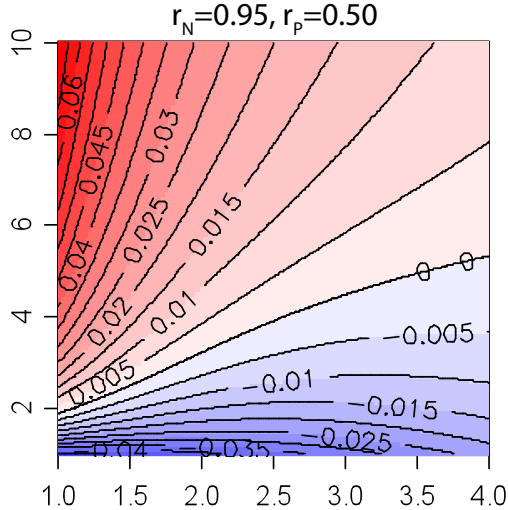

Relative risk of treatment failure in the private vs. public sector
